# Supplementary material for: Amperometric biosensor based on 3D ordered freestanding porous Pt nanowire array electrode
Source: Royal Society of Chemistry journal article supplement (doi:10.1039/c2nr31256e), 2012-01-01
Supplement: c2nr31256e.pdf [file c2nr31256e.pdf]

## Support Information

### Amperometric Biosensor Based on 3D Ordered Freestanding Porous Pt Nanowire Array Electrode

5 Yunli Wang,<sup>a</sup> Yingchun Zhu,<sup>\*a</sup> Jingjing Chen,<sup>b</sup> Yi Zeng<sup>b</sup>

<sup>a</sup> Shanghai Institute of Ceramics, Chinese Academy of Sciences, State Key Laboratory of High  
Performance Ceramics and Superfine Microstructure, Key Lab of Inorganic Coating Materials,  
Shanghai 200050, P. R. China

10 <sup>b</sup> Shanghai Institute of Ceramics, Chinese Academy of Sciences, Analysis and Testing Center for  
Inorganic Materials, Shanghai 200050, P. R. China

\* Author to whom any correspondence should be addressed, e-mail: yzhu@mail.sic.ac.cn, Fax:  
86-21-52412632, Tel: 86-21-52412632.

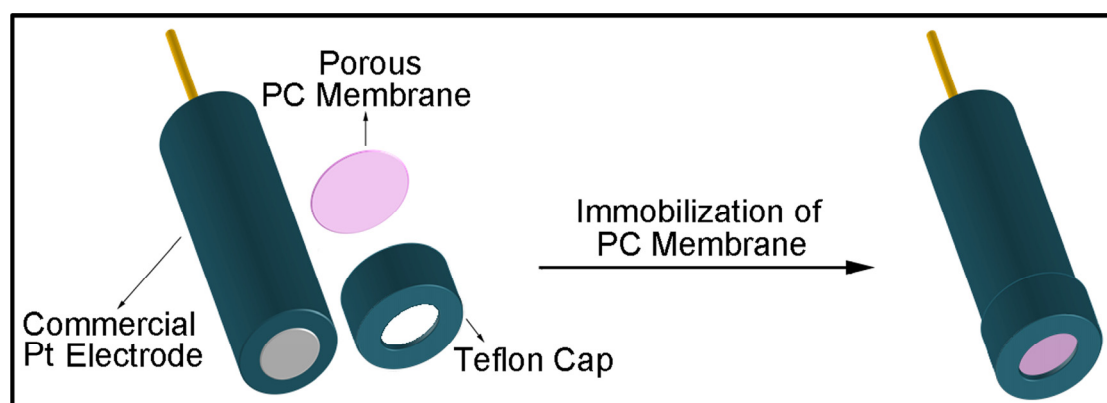

15 **Fig. S-1** Immobilization of porous polycarbonate (PC) membrane onto Pt disk electrode.
